# Supplementary material for: Homocysteine Levels and the Risk of Osteoporotic Fracture
Source: Atypon-hosted journal article supplement (doi:10.1056/nejmoa032546), 2004-05-12
Supplement: nejm_vanmeurs_2033sa1.pdf [file nejm_vanmeurs_2033sa1.pdf]

# Supplementary Appendix

This appendix has been provided by the authors to give readers additional information about their work.

Supplement to: van Meurs JBJ, Dhonukshe-Rutten RAM, Pluijm SMF, et al. Homocysteine Levels and the Risk of Osteoporotic Fracture. *N Engl J Med* 2004;350:2033-41.

**Supplementary Appendix. Distribution of Homocysteine Levels with the Use of a 75th Percentile Cutoff Value, According to Age.\***

| Age          | Rotterdam Study, Cohort 1 |                                         |              | Rotterdam Study, Cohort 2 |                                         |              | LASA |                                         |              |
|--------------|---------------------------|-----------------------------------------|--------------|---------------------------|-----------------------------------------|--------------|------|-----------------------------------------|--------------|
|              | No.                       | Homocysteine Level<br><i>μmol/liter</i> | Cutoff Value | No.                       | Homocysteine Level<br><i>μmol/liter</i> | Cutoff Value | No.  | Homocysteine Level<br><i>μmol/liter</i> | Cutoff Value |
| <b>Men</b>   |                           |                                         |              |                           |                                         |              |      |                                         |              |
| 55–59 Yr     | 20                        | 14.3±2.1                                | 15.5         |                           |                                         |              |      |                                         |              |
| 60–64 Yr     | 43                        | 14.2±2.9                                | 16.3         | 44                        | 11.7±4.2                                | 13.0         |      |                                         |              |
| 65–69 Yr     | 51                        | 17.1±4.9                                | 19.9         | 60                        | 11.2±2.9                                | 12.5         | 163  | 14.1±5.5                                | 15.8         |
| 70–74 Yr     | 38                        | 16.3±4.6                                | 17.9         | 49                        | 12.3±3.7                                | 14.7         | 140  | 15.2±5.4                                | 17.4         |
| 75–79 Yr     | 30                        | 16.3±4.2                                | 18.6         | 51                        | 12.1±3.6                                | 14.6         | 131  | 15.4±4.7                                | 17.7         |
| 80–84 Yr     | 20                        | 19.3±5.5                                | 22.8         | 52                        | 14.5±3.9                                | 17.0         | 132  | 17.3±7.3                                | 18.9         |
| ≥85 Yr       | 9                         | 24.8±11.7                               | 38.6         | 19                        | 16.3±7.9                                | 20.5         | 62   | 18.5±11.0                               | 21.4         |
| <b>Women</b> |                           |                                         |              |                           |                                         |              |      |                                         |              |
| 55–59 Yr     | 42                        | 12.6±2.4                                | 15.1         |                           |                                         |              |      |                                         |              |
| 60–64 Yr     | 80                        | 13.3±3.2                                | 14.7         | 52                        | 9.6±2.6                                 | 11.8         |      |                                         |              |
| 65–69 Yr     | 54                        | 14.6±5.3                                | 16.7         | 51                        | 10.2±3.2                                | 11.1         | 165  | 12.7±4.8                                | 14.4         |
| 70–74 Yr     | 73                        | 16.6±5.0                                | 19.0         | 57                        | 11.1±4.2                                | 12.2         | 171  | 12.6±4.3                                | 14.6         |
| 75–79 Yr     | 42                        | 16.5±5.9                                | 18.3         | 45                        | 11.2±3.9                                | 13.2         | 143  | 13.8±4.6                                | 16.2         |
| 80–84 Yr     | 30                        | 17.5±6.6                                | 18.7         | 38                        | 13.2±5.8                                | 14.3         | 116  | 15.3±6.2                                | 17.9         |
| ≥85 Yr       | 30                        | 21.3±10.9                               | 24.1         | 35                        | 13.4±4.8                                | 15.4         | 68   | 16.2±5.7                                | 19.3         |

\* Plus-minus values are means ±SD. In cohort 1 of the Rotterdam Study, homocysteine levels were measured in serum; in cohort 2, in sodium citrate-treated plasma; and in the LASA study, in EDTA-treated plasma.
